# Supplementary material for: Efficient Dye Contaminant Elimination and Simultaneously Electricity Production via a Bi-Doped TiO2 Photocatalytic Fuel Cell
Source: MDPI journal article supplement (doi:10.3390/nano12020210), 2022-01-10
Supplement: s1 [file s1]

## Supplementary material

# Efficient Dye Contaminant Elimination and Simultaneously Electricity Production via a Bi-Doped TiO<sub>2</sub> Photocatalytic Fuel Cell

Dong Liu <sup>1,2,\*</sup>, Chunling Li <sup>1</sup>, Congyue Zhao <sup>1</sup>, Er Nie <sup>2,\*</sup>, Jianqiao Wang <sup>2</sup>, Jun Zhou <sup>2</sup> and Qian Zhao <sup>1,\*</sup>

<sup>1</sup> School of Public Health, Xinxiang Medical University, Xinxiang 453003, China; li\_chunling163@163.com (C.L.); zcy19990518@163.com (C.Z.);

<sup>2</sup> Engineering Research Center for Nanophotonics and Advanced Instrument, Ministry of Education, School of Physics and Electronic Science, East China Normal University, Shanghai 200241, China; wang.jianqiao@huafeng.com (J.W.); ashley\_zhou94@163.com (J.Z.)

\* Correspondence: liudong081@163.com (D.L.); enie@phy.ecnu.edu.cn (E.N.); zhqzhaoqian@126.com (Q.Z.); Tel.: +86-373-3831063 (D.L.)

Photocatalytic degradation of RhB by TiO<sub>2</sub>, BT-1, BT-2 BT-3 BT-4 and BT-5 powers were performed under visible light irradiation, as shown in Figure S1. It is observed that BT-3 exhibited the highest photocatalytic performance. The BT-3 has the best efficiency in both powder and photoanode.

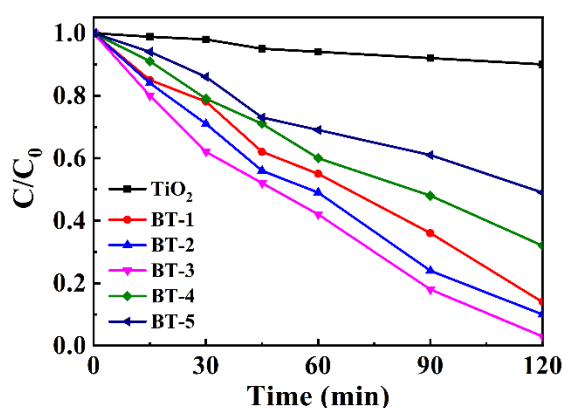

**Figure S1.** Photocatalytic degradation of RhB by TiO<sub>2</sub> and BT powers under visible light irradiation.

The SEM image and XRD pattern of BT-3 after the photocatalytic reaction were also investigated to further evaluate the stability of the catalyst. As shown in Figure S2 and Figure S3, there was no significant change in the its microtopography and crystal form before and after the photocatalytic experiment, which suggested that the BT catalysts exhibited good stability.

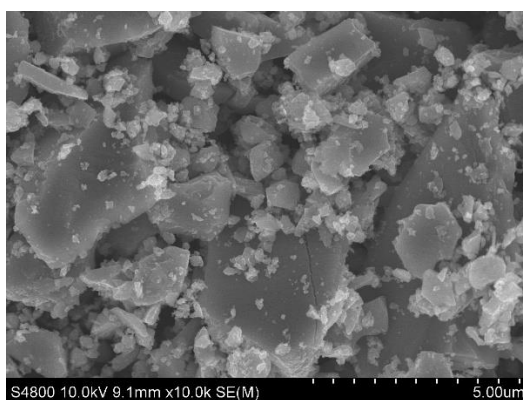

**Figure S2.** SEM image of BT-3 after the photocatalytic reaction.

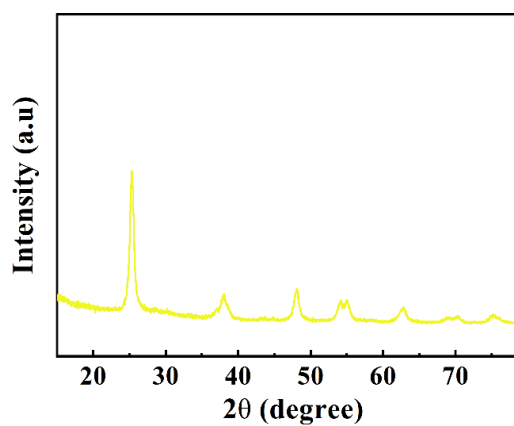

**Figure S3.** XRD pattern of BT-3 after the photocatalytic reaction.

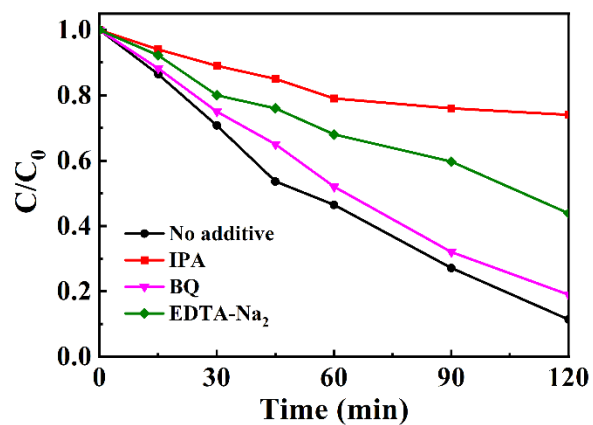

**Figure S4.** PFC degradation of RhB with existence of scavengers.

The electron transfer was recorded directly by ZF-100 electrochemical workstations. The charges transfer were regarded as  $Q_{total}$  when 10 mg L<sup>-1</sup> of RhB aqueous solutions was obtained and  $Q_{blank}$  without any fuel. The net charge was obtained by  $Q_{total}$  minus  $Q_{blank}$ .

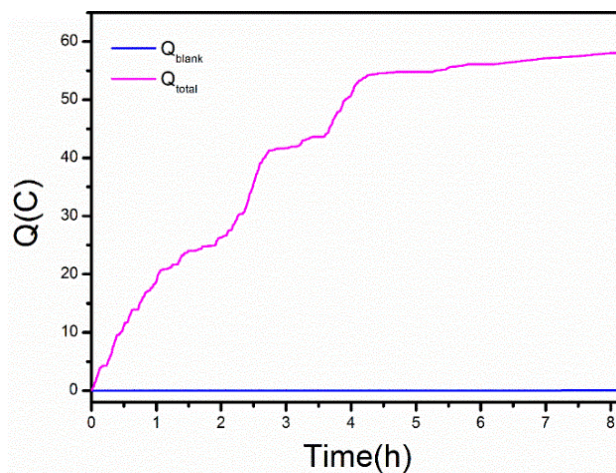

**Figure S5.** The  $Q_{total}$  and  $Q_{blank}$  of PFC process.

The PFC degradation of RhB was fitted by the first-order kinetic equation as shown in the Table S1.

**Table S1.** The kinetic equation of TiO<sub>2</sub> and 1–5% Bi-TiO<sub>2</sub> PFC

| Photoanode            | Kinetic Equation                 | R <sup>2</sup> |
|-----------------------|----------------------------------|----------------|
| Pure TiO <sub>2</sub> | $-\ln(C/C_0) = 0.0015t - 0.0145$ | 0.9953         |
| BT-1                  | $-\ln(C/C_0) = 0.0037t + 0.106$  | 0.9894         |
| BT-2                  | $-\ln(C/C_0) = 0.0042t - 0.0022$ | 0.9988         |
| BT-3                  | $-\ln(C/C_0) = 0.0052t + 0.2609$ | 0.9292         |
| BT-4                  | $-\ln(C/C_0) = 0.0026t - 0.0003$ | 0.9713         |
| BT-5                  | $-\ln(C/C_0) = 0.0018t + 0.0097$ | 0.9891         |
